# Supplementary material for: Novel nickel–cobalt phosphite with face-sharing octahedra derived electrocatalyst for efficient water splitting
Source: Royal Society of Chemistry journal article supplement (doi:10.1039/c9qi00370c), 2019-01-01
Supplement: c9qi00370c1.pdf [file c9qi00370c1.pdf]

## **Novel nickel-cobalt phosphite with face-sharing octahedra derived electrocatalyst for efficient water splitting**

*Jian Wu, <sup>\*a</sup> Lingling Lin,<sup>a</sup> Francois Jacques Morvan <sup>a</sup>, Juan Du<sup>\*a</sup> and Weibin Fan<sup>\*b</sup>*

*<sup>a</sup>Key Laboratory of Magnetic Materials and Devices, Ningbo Institute of Materials Technology and Engineering, Chinese Academy of Sciences, Ningbo, 315201, P. R. China*

*<sup>b</sup>State Key Laboratory of Coal Conversion, Institute of Coal Chemistry, Chinese Academy of Sciences, Taiyuan, 030001, P. R. China*

\*Corresponding author's email: E-mail: [jwu@nimte.ac.cn](mailto:jwu@nimte.ac.cn)

**Keywords:** Cobalt-nickel microporous materials, Ni<sub>2</sub>P, theoretical calculation, water splitting.

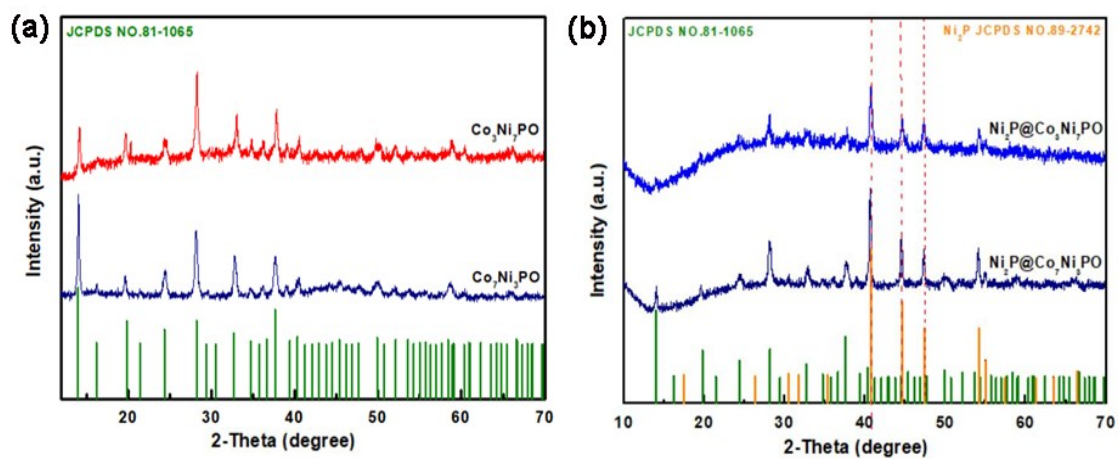

**Figure S1.** XRD pattern of  $\text{Co}_3\text{Ni}_7\text{PO}$  and  $\text{Co}_7\text{Ni}_3\text{PO}$  (a);  $\text{Ni}_2\text{P}@Co_3\text{Ni}_7\text{PO}$  and  $\text{Ni}_2\text{P}@Co_7\text{Ni}_3\text{PO}$  (b).

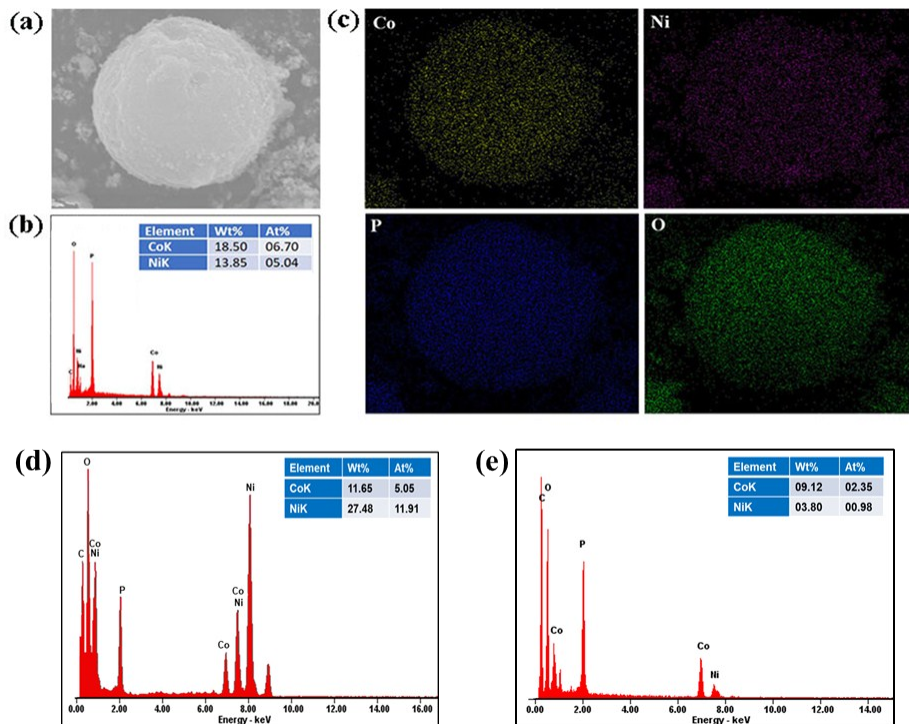

**Figure S2.** (a) SEM images of CoNiPO. (b) The EDS spectrum of CoNiPO. (c) Elemental mapping images of CoNiPO with yellow for Co, blue for Ni, gray for O and red for P, respectively. The EDS spectrum of  $\text{Co}_3\text{Ni}_7\text{PO}$  (d) and  $\text{Co}_7\text{Ni}_3\text{PO}$  (e).

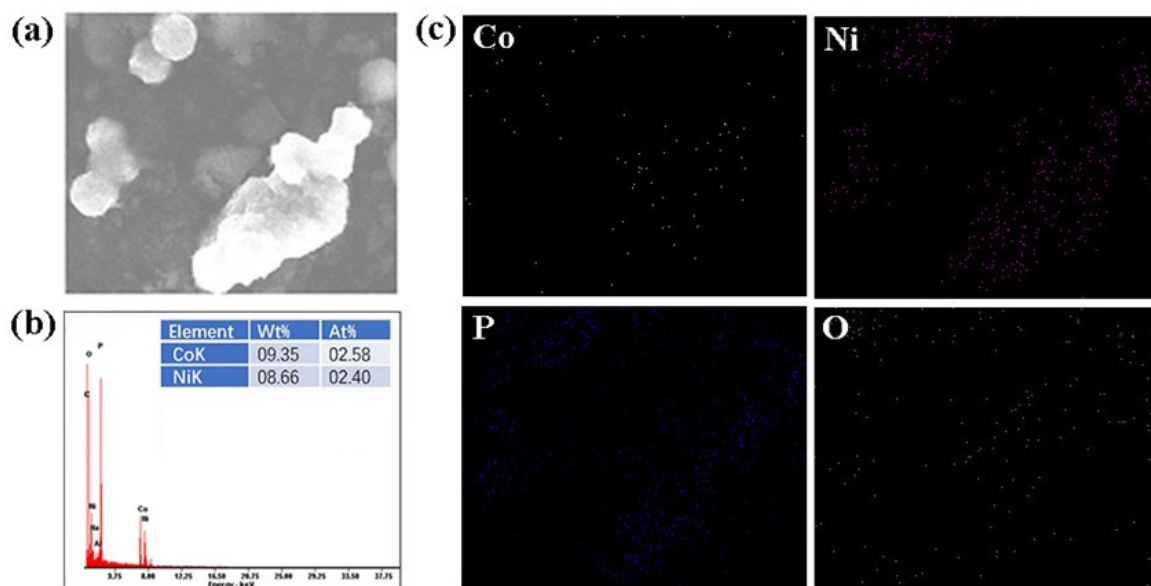

**Figure S3.** (a) SEM images of Ni<sub>2</sub>P@CoNiPO. (b) The EDS spectrum of Ni<sub>2</sub>P@CoNiPO. (c) Elemental mapping images of Ni<sub>2</sub>P@CoNiPO with yellow for Co, blue for Ni, gray for O and red for P, respectively.

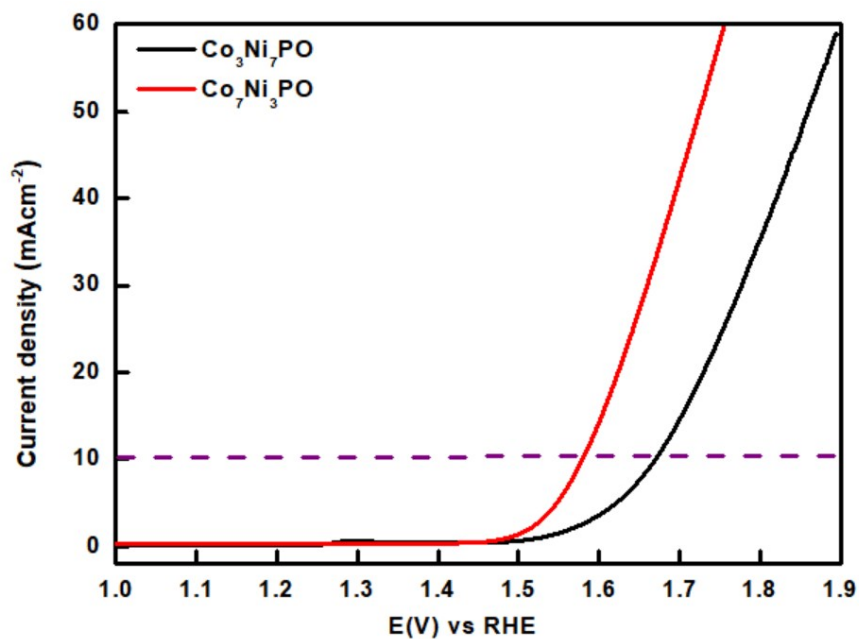

**Figure S4.** Polarization LSV curves of Co<sub>3</sub>Ni<sub>7</sub>PO and Co<sub>7</sub>Ni<sub>3</sub>PO.

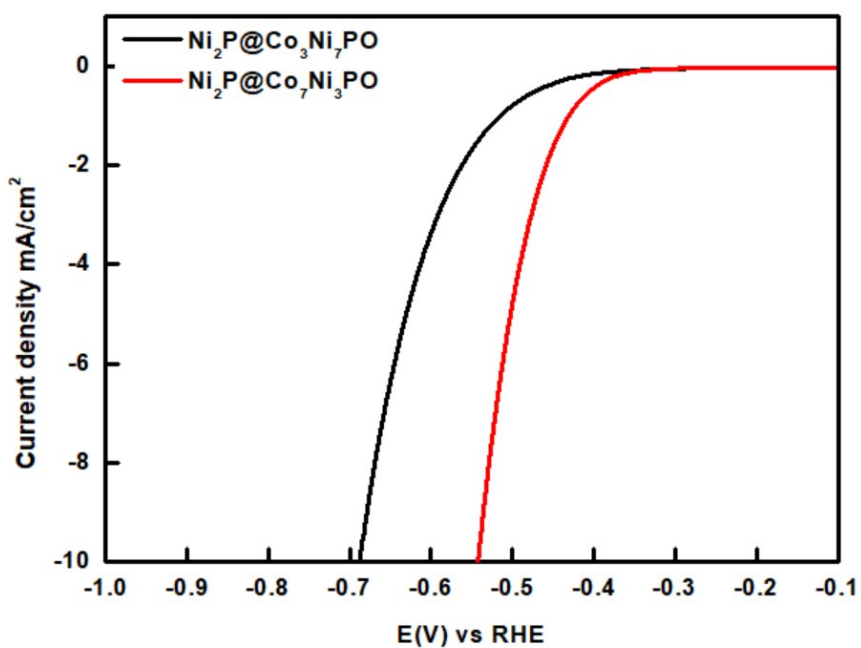

**Figure S5.** Polarization LSV curves of Ni<sub>2</sub>P@Co<sub>3</sub>Ni<sub>7</sub>PO and Ni<sub>2</sub>P@Co<sub>7</sub>Ni<sub>3</sub>PO.

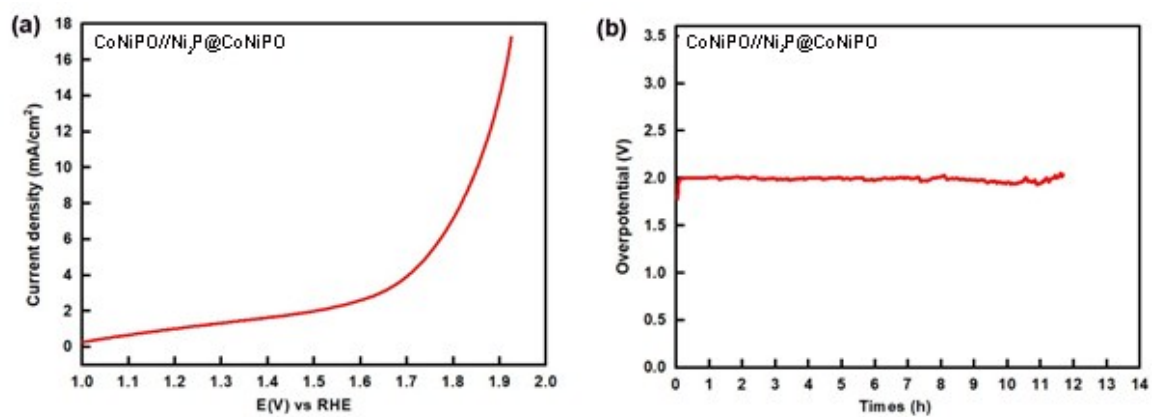

**Figure S6.** (a) Polarization LSV curves and (d) Time-dependent current density curve of OER at 10 mA cm<sup>-2</sup> using CoNiPO//Ni<sub>2</sub>P@CoNiPO as catalyst.

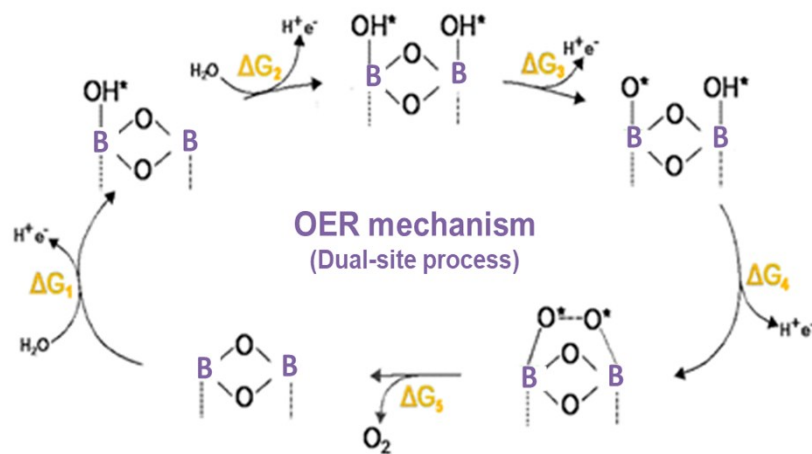

**Figure S7.** OER mechanism using a two-site model. After four electron-proton electrochemical steps labeled as  $\Delta G(1-4)$ , there is an additional pure chemical step  $\Delta G5$ .<sup>4</sup>

**Table S1.** Comparison of the OER activity for several recently reported active non-metal based electrocatalysts in alkaline solution.

| Electrocatalysts                        | Overpotetial(mV)<br>$j=10\text{mA}/\text{cm}^{-2}$ | Tafel slope<br>(mV dec <sup>-1</sup> ) | Electrolyte<br>(pH) | Reference. |
|-----------------------------------------|----------------------------------------------------|----------------------------------------|---------------------|------------|
| NiCoPO                                  | 320                                                | 84                                     | 0.1 M KOH           | This work  |
| NiPO                                    | 370                                                | 121                                    | 0.1 M KOH           | This work  |
| CoPO                                    | 400                                                | 139                                    | 0.1 M KOH           | This work  |
| NiOOH                                   | 360                                                | 111                                    | 0.1 M KOH           | 1          |
| $\gamma$ -CoOOH                         | 300                                                | ~                                      | 0.1 M KOH           | 2          |
| $\alpha$ -Ni(OH) <sub>2</sub> spheres   | 331                                                | 42                                     | 0.1 M KOH           | 3          |
| $\beta$ -Ni(OH) <sub>2</sub> nanoplates | 444                                                | 111                                    | 0.1 M KOH           | 3          |
| LiNiO <sub>2</sub>                      | 500                                                | 68                                     | 0.1 M KOH           | 4          |
| NiCo-LDH                                | 290                                                | ~                                      | 0.1 M KOH           | 5          |
| Ni-Co binary oxide                      | 325                                                | 39                                     | 0.1 M KOH           | 6          |
| Ni-Co oxide nanosheets                  | 340                                                | 51                                     | 0.1 M KOH           | 7          |



**Table S2.** Comparison of the HER activity for several recently reported nickel phosphides based electrocatalysts in acid solution.

| Electrocatalysts                                            | Overpotential (mV)<br>$j = 10 \text{ mA/cm}^{-2}$ | Tafel slope<br>(mV dec <sup>-1</sup> ) | Electrolyte<br>(pH) | Reference. |
|-------------------------------------------------------------|---------------------------------------------------|----------------------------------------|---------------------|------------|
| Ni <sub>2</sub> P@NiCoPO                                    | 180                                               | 47                                     | 0.1 M KOH           | This work  |
| Ni <sub>2</sub> P@NiPO                                      | 400                                               | 109                                    | 0.1 M KOH           | This work  |
| Ni <sub>2</sub> P nanoparticles                             | 130                                               | 84                                     | 0.1 M KOH           | 8          |
| Ni <sub>2</sub> P nanorods                                  | 131                                               | 106                                    | 0.1 M KOH           | 9          |
| N <sub>2</sub> P/GC                                         | 120                                               | 87                                     | 0.1 M KOH           | 10         |
| N <sub>2</sub> P/Ni foam                                    | 120                                               | 60                                     | 0.1 M KOH           | 11         |
| N <sub>2</sub> P/Carbon                                     | 115                                               | 54                                     | 0.1 M KOH           | 12         |
| Ni <sub>2</sub> P NPs/Ti                                    | 138                                               | 60                                     | 0.1 M KOH           | 13         |
| Ni <sub>12</sub> P <sub>5</sub> nanoparticles               | 175                                               | 63                                     | 0.1 M KOH           | 14         |
| Ni <sub>5</sub> P <sub>4</sub> -Ni <sub>2</sub> P nanosheet | 140                                               | 79.1                                   | 0.1 M KOH           | 15         |

## Reference

- (1) Wang, H.-Y.; Hsu, Y.-Y.; Chen, R.; Chan, T.-S.; Chen, H. M.; Liu, B.. *Advanced Energy Materials* **2015**, *5* (10), 1500091.
- (2) Huang, J.; Chen, J.; Yao, T.; He, J.; Jiang, S.; Sun, Z.; Liu, Q.; Cheng, W.; Hu, F.; Jiang, Y. et al. *Angew Chem Int Ed* **2015**, *54* (30), 8722.
- (3) Gao, M.; Sheng, W.; Zhuang, Z.; Fang, Q.; Gu, S.; Jiang, J.; Yan, Y. *J Am Chem Soc* **2014**, *136* (19), 7077.
- (4) Wu, J.; Wang, G.; Du, J.; Liu, J. P.; Wang, J.; Fan, W. *ChemCatChem* **2018**, *10* (12), 2551.
- (5) Jiang, J.; Zhang, A.; Li, L.; Ai, L. *Journal of Power Sources* **2015**, *278*, 445.
- (6) Zhao, Z.; Wu, H.; He, H.; Xu, X.; Jin, Y. *Advanced Functional Materials* **2014**, *24* (29), 4698.
- (7) Miner, E. M.; Dincă, M. *Nature Energy* **2016**, *1* (12).
- (8) Popczun, E. J.; McKone, J. R.; Read, C. G.; Biacchi, A. J.; Wiltrout, A. M.; Lewis, N. S.; Schaak, R. E. *Journal of the American Chemical Society* **2013**, *135* (25), 9267.
- (9) Wang, X.; Kolen'ko, Y. V.; Liu, L. *Chem Commun* **2015**, *51* (31), 6738.
- (10) Li, J.; Yan, M.; Zhou, X.; Huang, Z.-Q.; Xia, Z.; Chang, C.-R.; Ma, Y.; Qu, Y. *Advanced Functional Materials* **2016**, *26* (37), 6785.
- (11) Shi, Y.; Xu, Y.; Zhuo, S.; Zhang, J.; Zhang, B. *ACS Appl Mater Interfaces* **2015**, *7* (4), 2376.
- (12) Bai, Y.; Zhang, H.; Li, X.; Liu, L.; Xu, H.; Qiu, H.; Wang, Y. *Nanoscale* **2015**, *7* (4), 1446.
- (13) Pu, Z.; Liu, Q.; Tang, C.; Asiri, A. M.; Sun, X. *Nanoscale* **2014**, *6* (19), 11031.
- (14) Huang, Z. P.; Chen, Z. B.; Chen, Z. Z.; Lv, C. C.; Meng, H.; Zhang, C. *ACS Nano* **2014**, *8* (8), 8121.
- (15) Wang, X.; Kolen'ko, Y. V.; Bao, X. Q.; Kovnir, K.; Liu, L. *Angew Chem Int Ed Engl* **2015**, *54* (28), 8188.
